# Supplementary material
Source: PubMed Central journal article supplement (PMC7086513)
Supplement: 41596_2018_BFnprot2018024_MOESM28_ESM.pdf [file 41596_2018_BFnprot2018024_MOESM28_ESM.pdf]

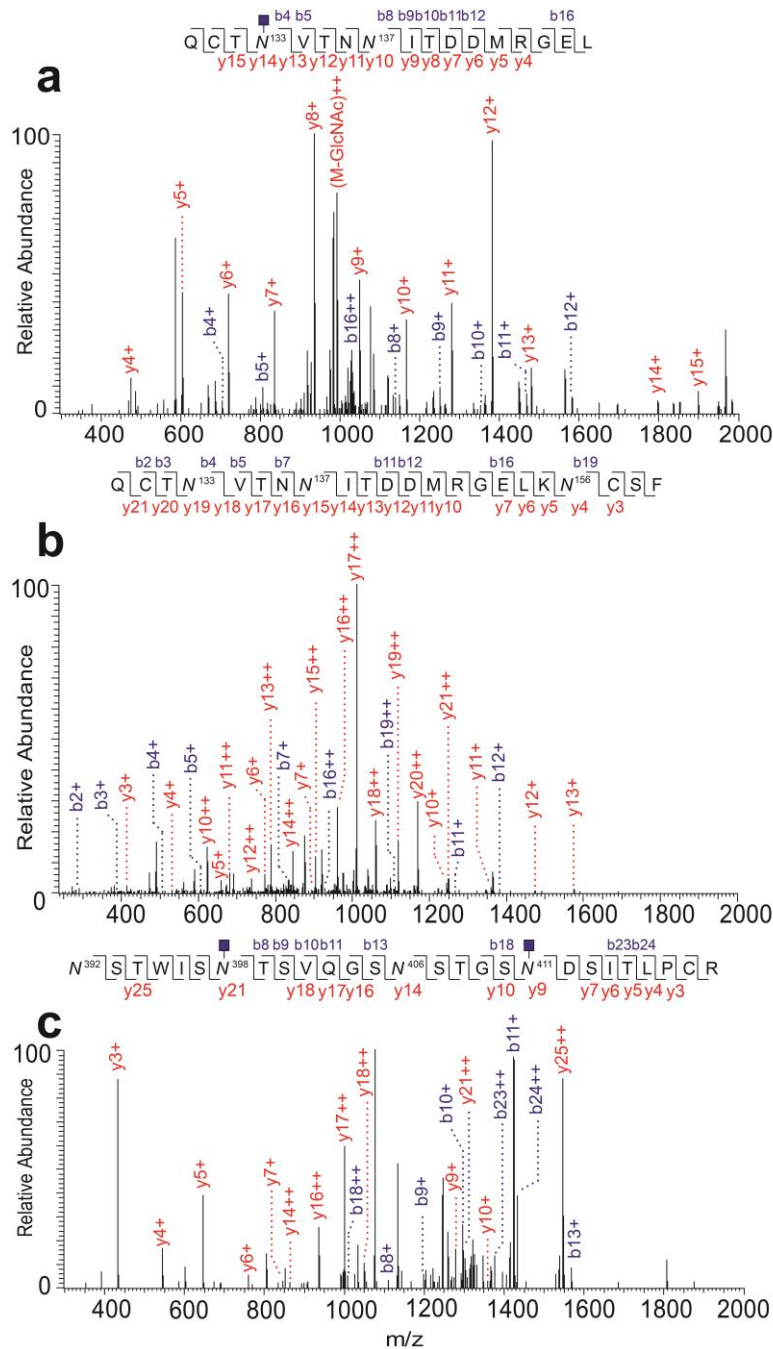

### Supplementary Figure 1

Identification of peptides with multiple glycosylation sites with the protocol.

MS/MS spectra and fragment assignment of the (a) di-glycosylated, (b) tri-glycosylated, and (c) tetra-glycosylated peptides derived from BG505 SOSIP.664.

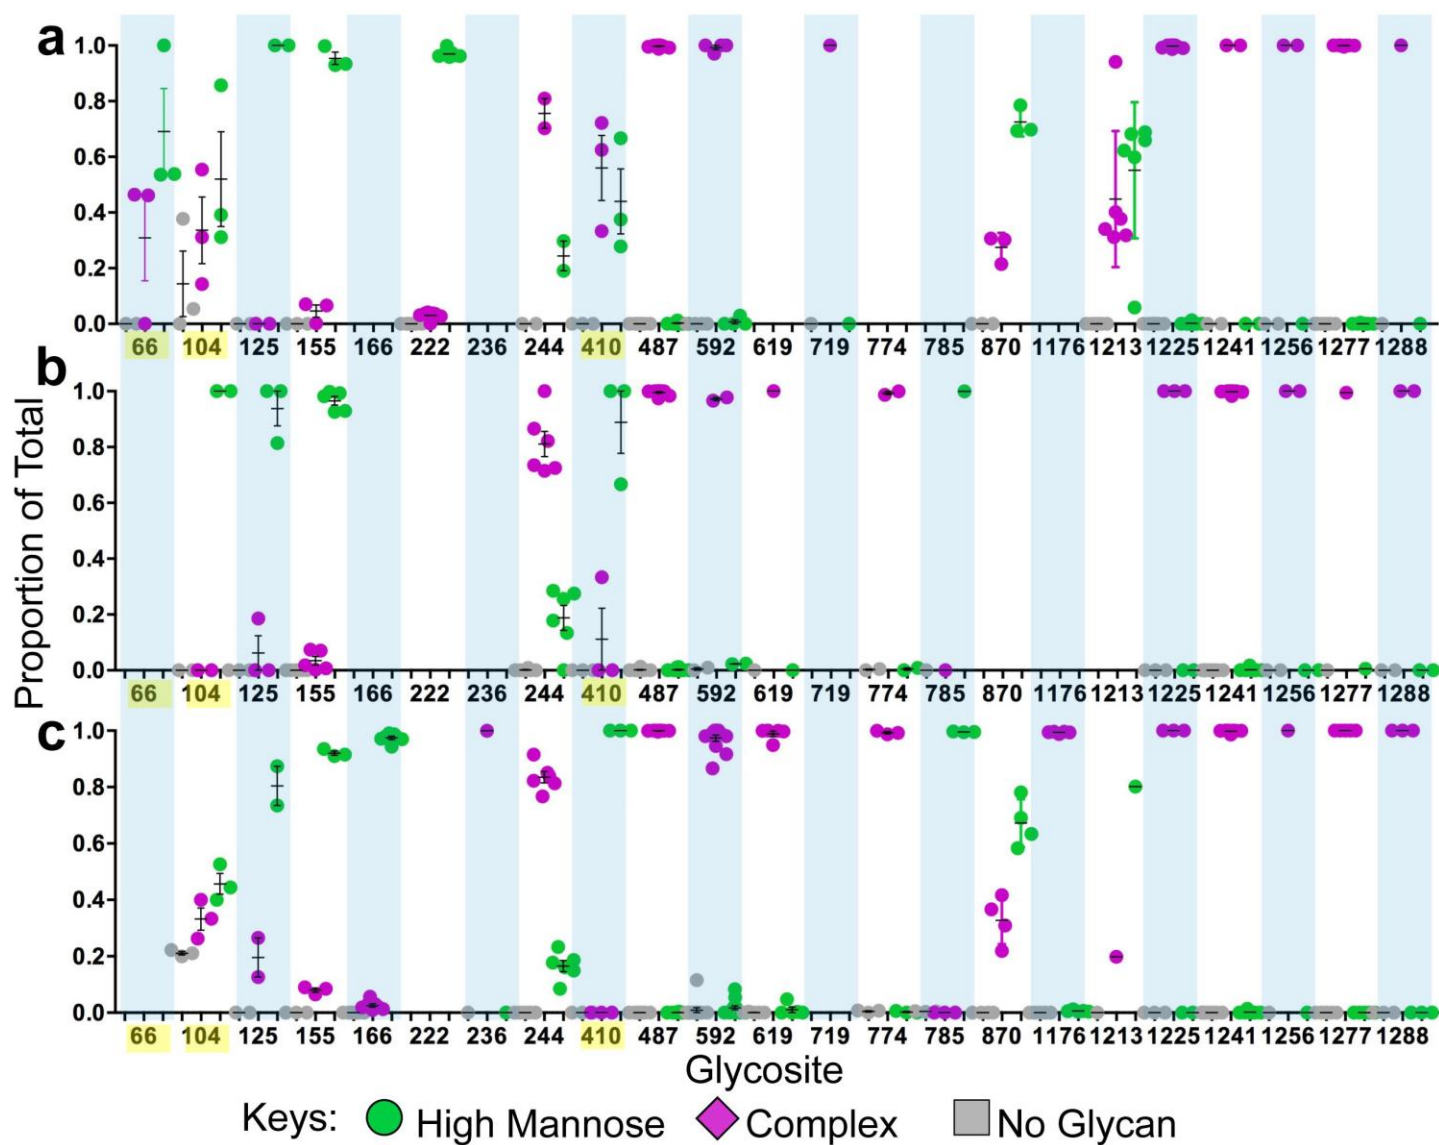

**Supplementary Figure 2**

Scatter plot of site-specific N-glycan processing of MERS-CoV S protein with a breakdown on the used proteases.

(a) Triple digestion, (b) the combination of trypsin and chymotrypsin, (c) chymotrypsin. The proportions of high mannose and complex type glycans at those glycosites highlighted in yellow were assigned based on the proportion of spectra hits since peak area did not reach the threshold. Mean  $\pm$  SEM were plotted.

## Supplementary Information for

### Global site-specific analysis of glycoprotein N-glycan processing

Liwei Cao<sup>1</sup>, Jolene K. Diedrich<sup>1</sup>, Yuanhui Ma<sup>1</sup>, Nianshuang Wang<sup>4</sup>, Matthias Pauthner<sup>2</sup>, Sung-Kyu Robin Park<sup>1</sup>, Claire M. Delahunty<sup>1</sup>, Jason S. McLellan<sup>4</sup>, Dennis R. Burton<sup>2,3</sup>, John R. Yates<sup>1</sup>, James C. Paulson<sup>1,2</sup>

<sup>1</sup> Department of Molecular Medicine, The Scripps Research Institute, La Jolla, CA 92037, USA. <sup>2</sup> Department of Immunology and Microbiology, Center for HIV/AIDS Vaccine Immunology and Immunogen Discovery and IAVI Neutralizing Antibody Center, The Scripps Research Institute, La Jolla, CA 92037, USA. <sup>3</sup> Ragon Institute of MGH, MIT and Harvard, Cambridge, MA 0239, USA. <sup>4</sup> Department of Biochemistry and Cell Biology, Geisel School of Medicine at Dartmouth, Hanover, NH 03755, USA.

**Supplementary Table 1**

Identification of the peptide glycosite N155 on MERS-CoV S protein by using the protocol.

| <b>Glycosite</b> | <b>Peptides identified</b> |
|------------------|----------------------------|
| 155              | A.FMLGSSVGN#F.S            |
|                  | A.FMLGSSVGN#FSDGK.M        |
|                  | A.FMLGSSVGN#FSDGKM.G       |
|                  | F.MLGSSVGN#F.S             |
|                  | F.MLGSSVGN#FSDGK.M         |
|                  | F.MLGSSVGN#FSDGKM.G        |
|                  | F.MLGSSVGN#FSDGKMG.R       |
|                  | F.MLGSSVGN#FSDGKMGRF.F     |
|                  | F.MLGSSVGN#FSDGKMGRFF.N    |
|                  | G.SSVGN#FSDGK.M            |
|                  | G.SSVGN#FSDGKMG.R          |
|                  | G.SSVGN#FSDGKMGR.F         |
|                  | K.IYPAFMLGSSVGN#F.S        |
|                  | K.IYPAFMLGSSVGN#FSDGK.M    |
|                  | K.IYPAFMLGSSVGN#FSDGKMG.R  |
|                  | L.GSSVGN#FSDGK.M           |
|                  | L.GSSVGN#FSDGKM.G          |
|                  | L.GSSVGN#FSDGKMG.R         |
|                  | L.GSSVGN#FSDGKMGRFF.N      |
|                  | M.LGSSVGN#FSDGK.M          |
|                  | M.LGSSVGN#FSDGKM.G         |
|                  | M.LGSSVGN#FSDGKMG.R        |
|                  | M.LGSSVGN#FSDGKMGR.F       |
|                  | M.LGSSVGN#FSDGKMGRF.F      |
|                  | M.LGSSVGN#FSDGKMGRFF.N     |
|                  | R.KIYPAFMLGSSVGN#F.S       |
|                  | R.KIYPAFMLGSSVGN#FSDGK.M   |
|                  | S.SVGN#FSDGK.M             |
|                  | S.SVGN#FSDGKMG.R           |
|                  | S.SVGN#FSDGKMGRFF.N        |

### Supplementary Table 2

The number of MS/MS spectra that could be detected from each glycosylation site of invertase produced by the yeast *S. cerevisiae*.

| Glycosite | N+0  | N+3 | N+203 | Sum   |
|-----------|------|-----|-------|-------|
| 23        | 267  | 0   | 1045  | 1312  |
| 64        | 81   | 0   | 538   | 619   |
| 97        | 166  | 0   | 2423  | 2589  |
| 111       | 1957 | 20  | 2963  | 4940  |
| 118       | 123  | 0   | 4305  | 4428  |
| 165       | 68   | 0   | 1471  | 1539  |
| 266       | 81   | 32  | 987   | 1100  |
| 275       | 1061 | 33  | 449   | 1543  |
| 356       | 480  | 1   | 1526  | 2007  |
| 369       | 26   | 0   | 371   | 397   |
| 384       | 24   | 0   | 2391  | 2415  |
| 398       | 17   | 0   | 1515  | 1532  |
| 512       | 813  | 0   | 10546 | 11359 |

**Supplementary Table 3**

The number of MS/MS spectra that could be detected from each glycosylation site of alpha-1-acid glycoprotein from bovine serum.

| Glycosite | N+0 | N+3 | N+203 | Sum |
|-----------|-----|-----|-------|-----|
| 34        | 0   | 322 | 20    | 342 |
| 57        | 20  | 145 | 4     | 169 |
| 94        | 1   | 78  | 1     | 80  |
| 104       | 0   | 190 | 0     | 190 |
| 136       | 0   | 52  | 2     | 54  |

**Supplementary Table 4**

Percentages of spectra hits with non-enzymatic deamidation in total of all spectra hits identified.

| Protein                   | N+1  | Total | Percentage |
|---------------------------|------|-------|------------|
| invertase                 | 2898 | 64010 | 4.53%      |
| alpha-1-acid glycoprotein | 89   | 5995  | 1.48%      |

**Supplementary Table 5**

Percentages of spectra hits with  $^{18}\text{O}$ -incorporation into the C-termini of peptides in total of all spectra hits identified.

| Protein                   | $^{18}\text{O}$ -incorporation | Total | Percentage |
|---------------------------|--------------------------------|-------|------------|
| invertase                 | 224                            | 64010 | 0.35%      |
| alpha-1-acid glycoprotein | 261                            | 5995  | 4.35%      |
